# Supplementary material for: Amplicon-Based Next-Generation Sequencing as a Diagnostic Tool for the Detection of Phylotypes of Cutibacterium acnes in Orthopedic Implant-Associated Infections
Source: Front Microbiol. 2022 Apr 7;13:866893. doi: 10.3389/fmicb.2022.866893 (PMC9022064; doi:10.3389/fmicb.2022.866893)
Supplement: Supplementary file 5 [file Table_3.XLSX]

## Sheet: Sheet1
Table S3: Amplicon sequencing data - read numbers and filtering steps
Sample Name	input	filtered	% filtered	denoised	merged	non-chimeric	used for SLST assignment	unambigously assigned (above threshold)	% unambigously assigned above threshold	% unambigously assigned of input
Implant 8	27664	7715	27.89	7685	7456	5736	5736	5736	100	20.7345
Implant 9	42989	16840	39.17	16818	16299	14935	14935	14865	99.5313	34.5786
Implant 10	36516	15454	42.32	15435	15318	13049	13049	12810	98.1684	35.0805
Implant 11	32427	13434	41.43	13406	13138	10788	10788	10639	98.6188	32.8091
Implant 12	24126	9227	38.25	9222	9154	9137	9137	8812	96.443	36.5249
Implant 13	34017	11746	34.53	11640	11440	11261	11261	11041	98.0464	32.4573
Implant 15	35463	13909	39.22	13895	13727	13196	13196	12730	96.4686	35.8966
Implant 16	30268	11599	38.32	11593	11590	11590	11590	11584	99.9482	38.2714
Implant 17	31915	12271	38.45	12256	11976	11394	11394	10708	93.9793	33.5516
Implant 18	24840	9521	38.33	9506	9455	9297	9297	8890	95.6222	35.789
